# Supplementary material for: Lineage Range Estimation Method Reveals Fine-Scale Endemism Linked to Pleistocene Stability in Australian Rainforest Herpetofauna
Source: PubMed Central journal article supplement (PMC4447262; doi:10.1371/journal.pone.0126274), 2015-05-28
Supplement: pone.0126274.s001.pdf [file pone.0126274.s001.pdf]

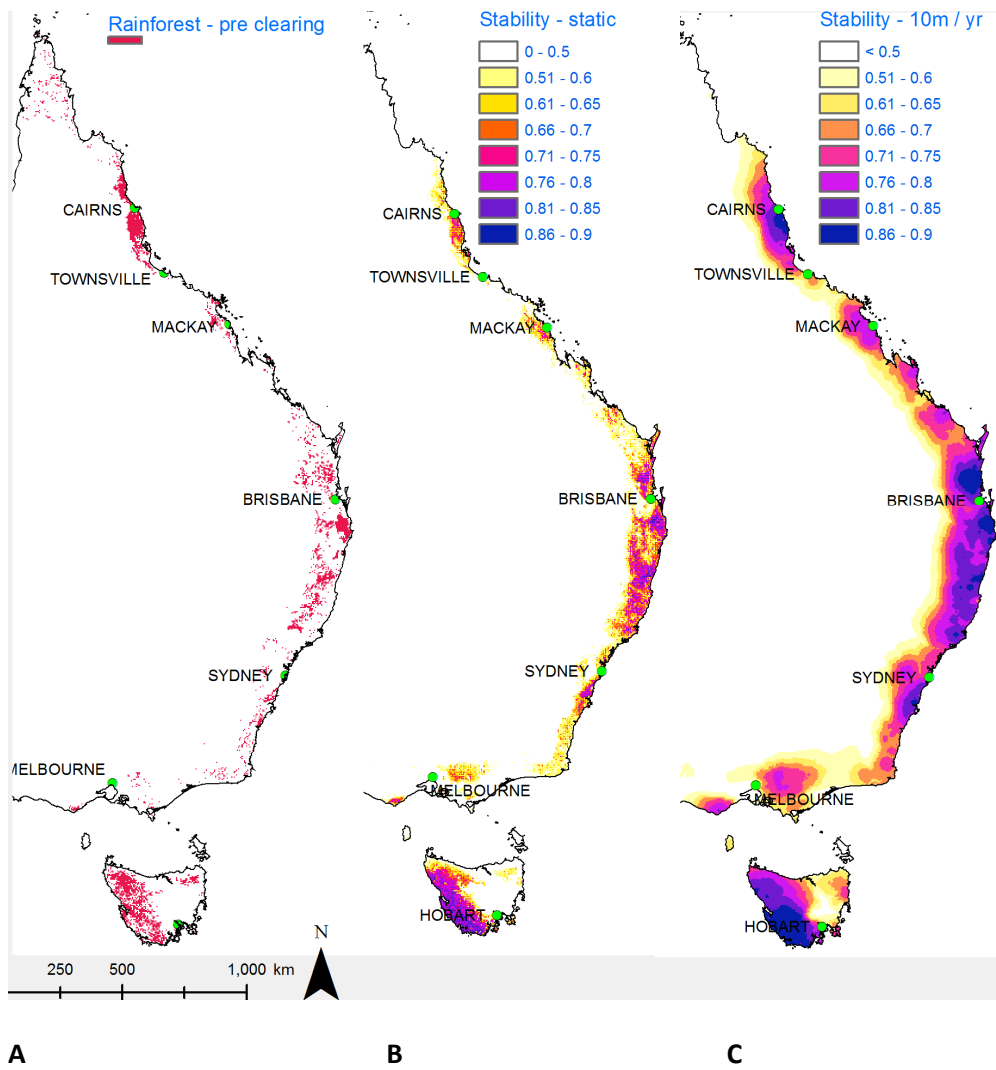

**Figure S1.** Stability of the climatic niche of rainforest since 120kya. (A) Pre-clearing rainforest from National Vegetation Information System. Stability of rainforest habitat under (B) Static and (C) dynamic 10m / yr models. Blue areas were predicted to have the most continuously suitable rainforest habitat.
