# Supplementary material for: Lineage Range Estimation Method Reveals Fine-Scale Endemism Linked to Pleistocene Stability in Australian Rainforest Herpetofauna
Source: PubMed Central journal article supplement (PMC4447262; doi:10.1371/journal.pone.0126274), 2015-05-28
Supplement: pone.0126274.s004.pdf [file pone.0126274.s004.pdf]

**Table S2: Variable contributions to the distribution model for present day rainforest**

| <b>Percent contribution</b> | <b>Variable</b> | <b>Description</b>                  |
|-----------------------------|-----------------|-------------------------------------|
| <b>56.3</b>                 | bioclim 12      | Annual precipitation                |
| <b>13</b>                   | bioclim 04      | Temperature seasonality             |
| <b>11.7</b>                 | slope           | Slope                               |
| <b>11.4</b>                 | bioclim 17      | Precipitation of driest quarter     |
| <b>2.7</b>                  | bioclim 15      | Precipitation seasonality           |
| <b>2.2</b>                  | elevation range | Elevation range                     |
| <b>1</b>                    | bioclim 11      | Mean temperature of wettest quarter |
| <b>0.6</b>                  | bioclim 01      | Annual mean temperature             |
| <b>0.6</b>                  | bioclim 10      | Mean temperature of warmest quarter |
| <b>0.3</b>                  | bioclim 16      | Precipitation of wettest quarter    |
