# Supplementary material for: Lineage Range Estimation Method Reveals Fine-Scale Endemism Linked to Pleistocene Stability in Australian Rainforest Herpetofauna
Source: PubMed Central journal article supplement (PMC4447262; doi:10.1371/journal.pone.0126274), 2015-05-28
Supplement: pone.0126274.s005.pdf [file pone.0126274.s005.pdf]

**Table S3: GLM Model Results**

GLM models were fitted with all combinations of up to 5 predictors, with region area included in all models. The top 5 models of 105 models, based on AIC are shown, with their standardized parameter values and Akaike weight. The top model has by far the greatest support, with a weight of 0.97.

| (Intercept) | Dynamic stability | Static stability | Mean annual temperature | Mean annual precipitation | Driest quarter precipitation | Current rainforest SDM | Topographic roughness | Region area | Delta AIC | Weight   |
|-------------|-------------------|------------------|-------------------------|---------------------------|------------------------------|------------------------|-----------------------|-------------|-----------|----------|
| 0           | 0.3650            | -                | -                       | 0.0895                    | -                            | 0.3054                 | 0.1848                | -0.5421     | 0         | 0.97333  |
| 0           | 0.4302            | -0.1093          | -                       | -                         | -                            | 0.4064                 | 0.1707                | -0.5654     | 7.572     | 0.02208  |
| 0           | 0.4267            | -                | -                       | -                         | -0.0718                      | 0.3613                 | 0.1564                | -0.5638     | 10.846    | 0.00429  |
| 0           | 0.3931            | -                | 0.0506                  | -                         | -                            | 0.3420                 | 0.1809                | -0.5494     | 16.572    | 0.00024  |
| 0           | 0.3911            | -                | -                       | -                         | -                            | 0.3464                 | 0.1667                | -0.5852     | 19.908    | 4.63E-05 |
