# Supplementary material for: Lineage Range Estimation Method Reveals Fine-Scale Endemism Linked to Pleistocene Stability in Australian Rainforest Herpetofauna
Source: PLoS One. 2015 May 28;10(5):e0126274. doi: 10.1371/journal.pone.0126274 (PMC4447262; doi:10.1371/journal.pone.0126274)
Supplement: S1 Table — Correlations (Pearson's r) are shown, between environmental predictor layers for those pixels within the 200km buffer used to model rainforest. (PDF) [file pone.0126274.s003.pdf]

**Table S1: Correlations between predictors used in the rainforest distribution model**

Correlations (Pearson's  $r$ ) are shown, between environmental predictor layers for those pixels within the 200km buffer used to model rainforest.

[illegible]
